# Supplementary material for: Hypoxia Triggers TAZ Phosphorylation in Basal A Triple Negative Breast Cancer Cells
Source: MDPI journal article supplement (doi:10.3390/ijms231710119), 2022-09-04

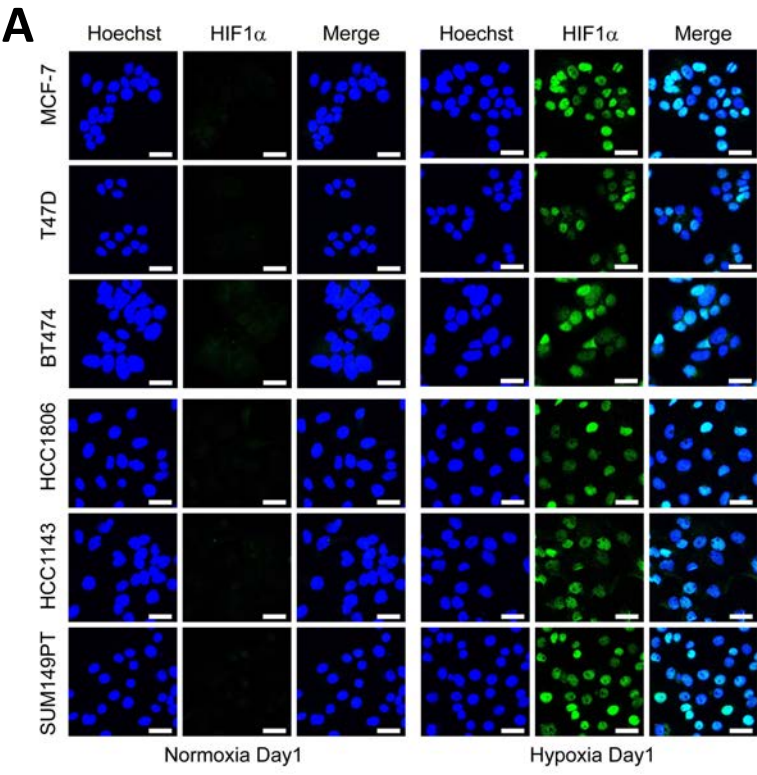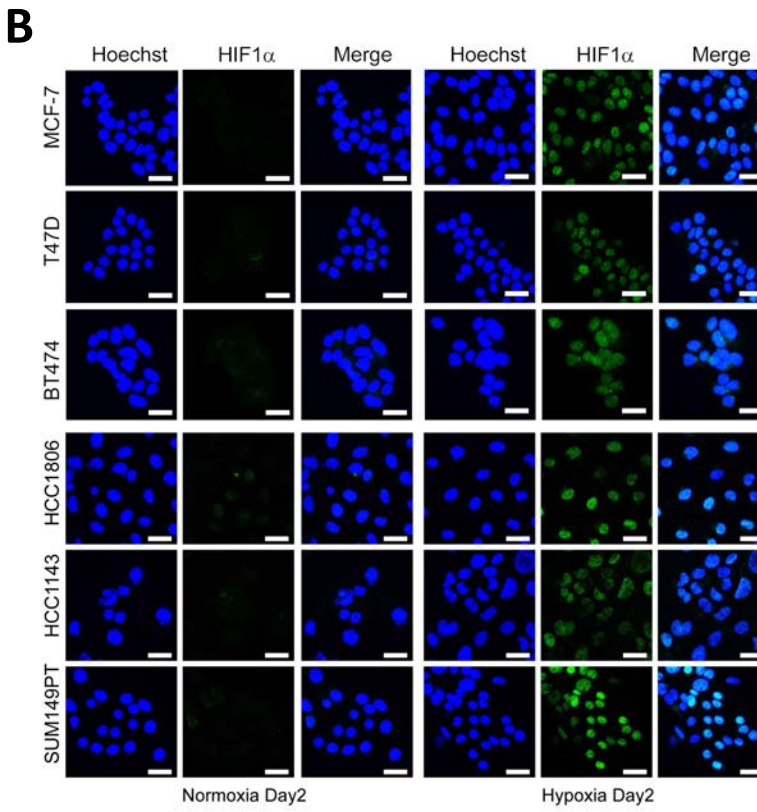

# MCF-7: GSEA all DEGs

A

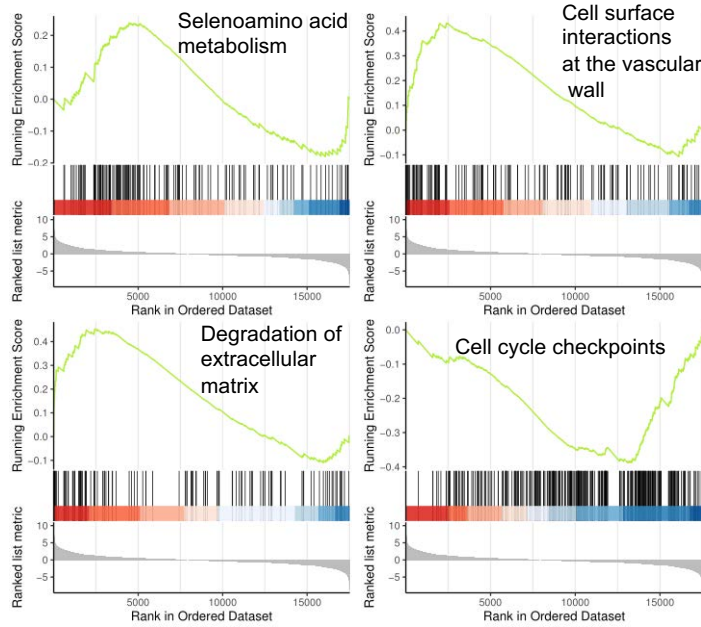

B

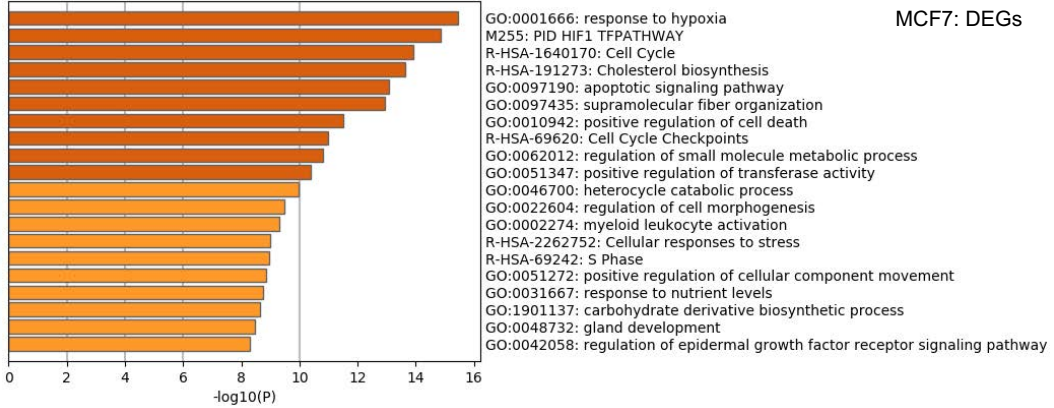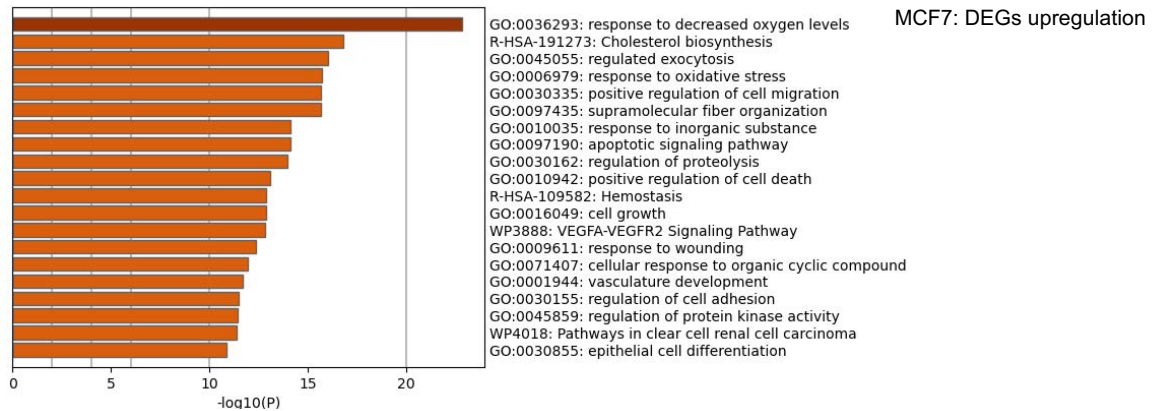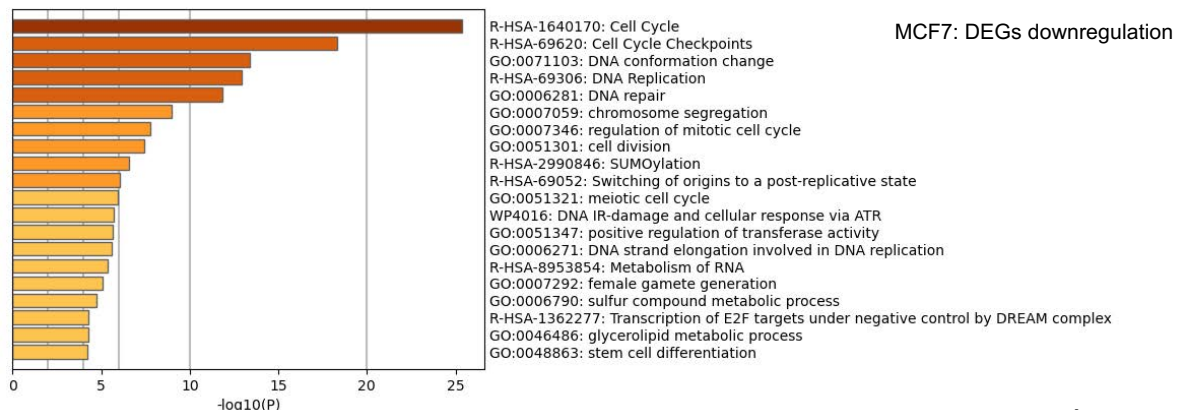

A

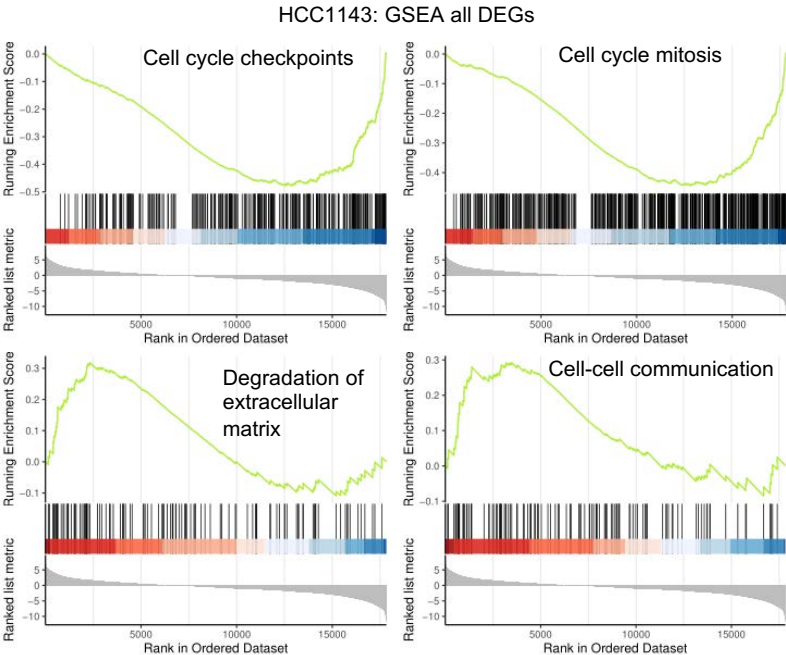

B

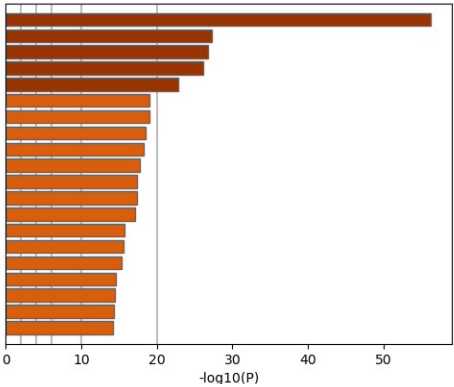

R-HSA-1640170: Cell Cycle  
GO:0044772: mitotic cell cycle phase transition  
R-HSA-69620: Cell Cycle Checkpoints  
R-HSA-8953854: Metabolism of RNA  
GO:0071103: DNA conformation change  
GO:0043043: peptide biosynthetic process  
R-HSA-3700989: Transcriptional Regulation by TP53  
GO:0022613: ribonucleoprotein complex biogenesis  
GO:0010638: positive regulation of organelle organization  
R-HSA-195258: RHO GTPase Effectors  
hsa05203: Viral carcinogenesis  
GO:0080135: regulation of cellular response to stress  
R-HSA-69242: S Phase  
GO:0006260: DNA replication  
GO:0007005: mitochondrion organization  
GO:0034660: ncRNA metabolic process  
GO:0033044: regulation of chromosome organization  
R-HSA-1280215: Cytokine Signaling in Immune system  
GO:0032200: telomere organization  
R-HSA-72766: Translation

HCC1143: DEGs

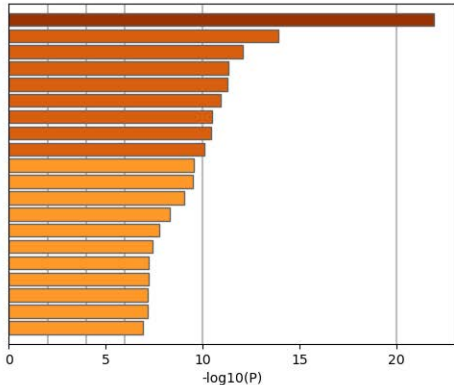

GO:0030036: actin cytoskeleton organization  
GO:0009611: response to wounding  
GO:0030198: extracellular matrix organization  
GO:0007169: transmembrane receptor protein tyrosine kinase signaling pathway  
GO:0030335: positive regulation of cell migration  
hsa04810: Regulation of actin cytoskeleton  
GO:0048589: developmental growth  
hsa04510: Focal adhesion  
GO:0045936: negative regulation of phosphate metabolic process  
GO:0031589: cell-substrate adhesion  
GO:0070848: response to growth factor  
WP3888: VEGFA-VEGFR2 Signaling Pathway  
GO:0008544: epidermis development  
GO:0030155: regulation of cell adhesion  
GO:0052547: regulation of peptidase activity  
GO:0048015: phosphatidylinositol-mediated signaling  
GO:0043068: positive regulation of programmed cell death  
GO:0010001: glial cell differentiation  
GO:0061572: actin filament bundle organization  
GO:0048729: tissue morphogenesis

HCC1143: DEGs upregulation

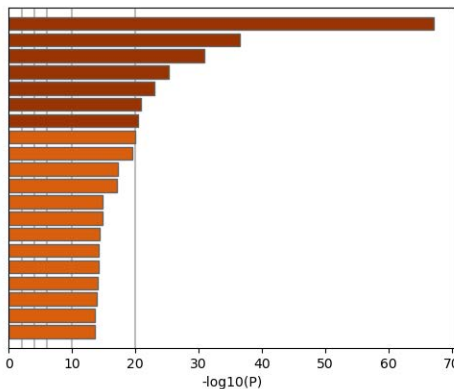

R-HSA-1640170: Cell Cycle  
R-HSA-69620: Cell Cycle Checkpoints  
R-HSA-8953854: Metabolism of RNA  
GO:0044772: mitotic cell cycle phase transition  
GO:0022613: ribonucleoprotein complex biogenesis  
R-HSA-69242: S Phase  
GO:0006260: DNA replication  
R-HSA-68882: Mitotic Anaphase  
GO:0034660: ncRNA metabolic process  
GO:0043043: peptide biosynthetic process  
R-HSA-3700989: Transcriptional Regulation by TP53  
WP2446: Retinoblastoma Gene in Cancer  
GO:0032200: telomere organization  
hsa05203: Viral carcinogenesis  
R-HSA-1280215: Cytokine Signaling in Immune system  
GO:0051301: cell division  
GO:0000209: protein polyubiquitination  
GO:0007005: mitochondrion organization  
ko03013: RNA transport  
R-HSA-69275: G2/M Transition

HCC1143: DEGs downregulation

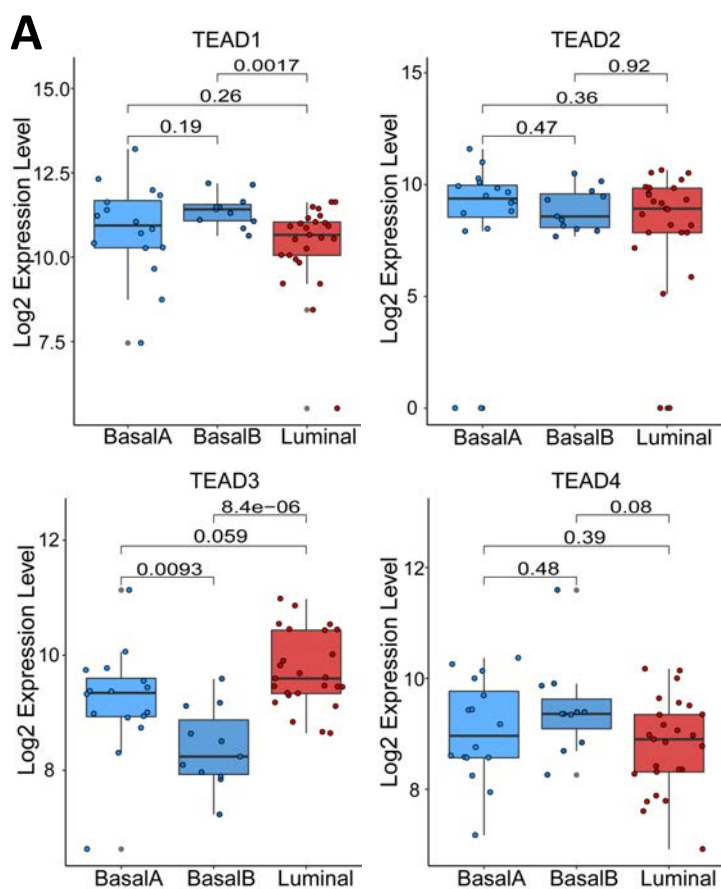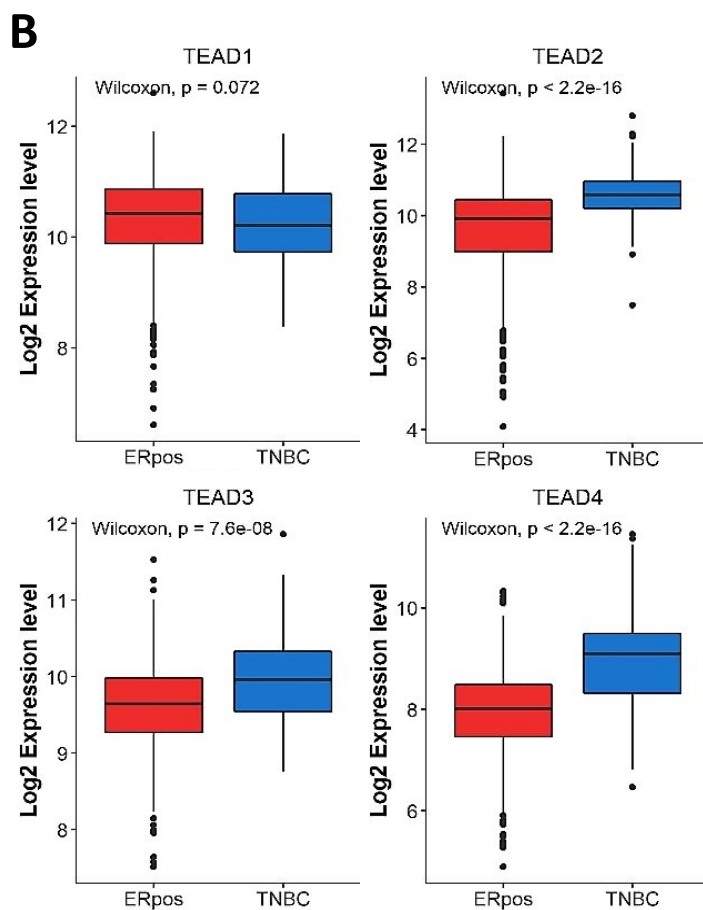



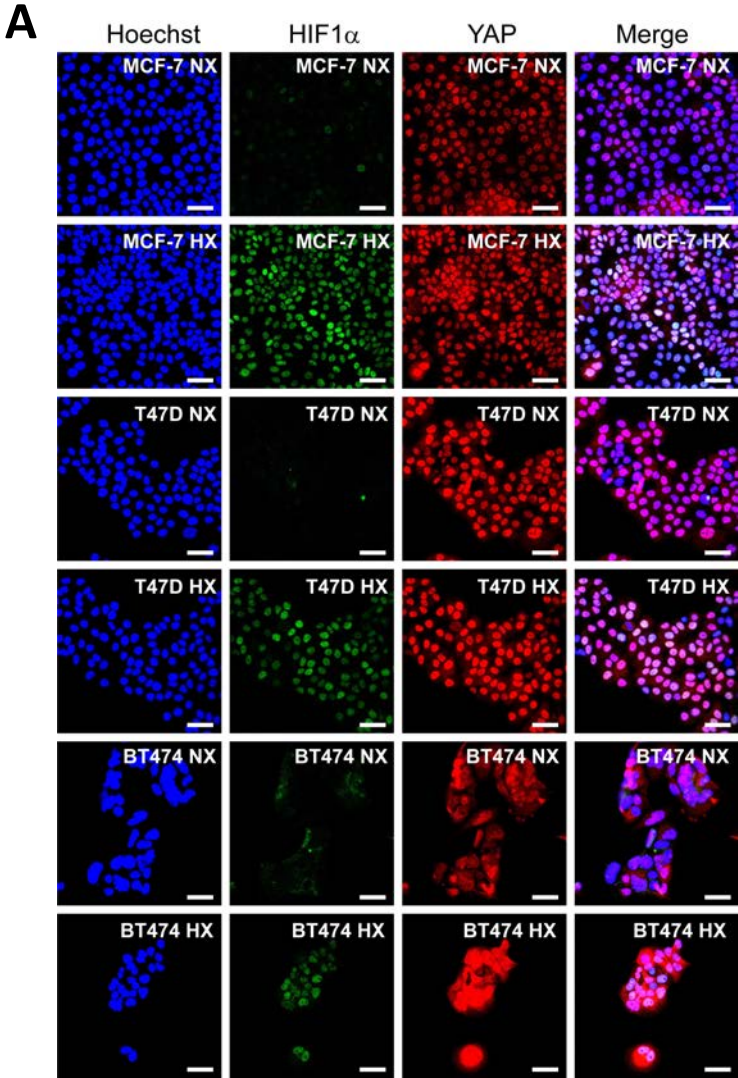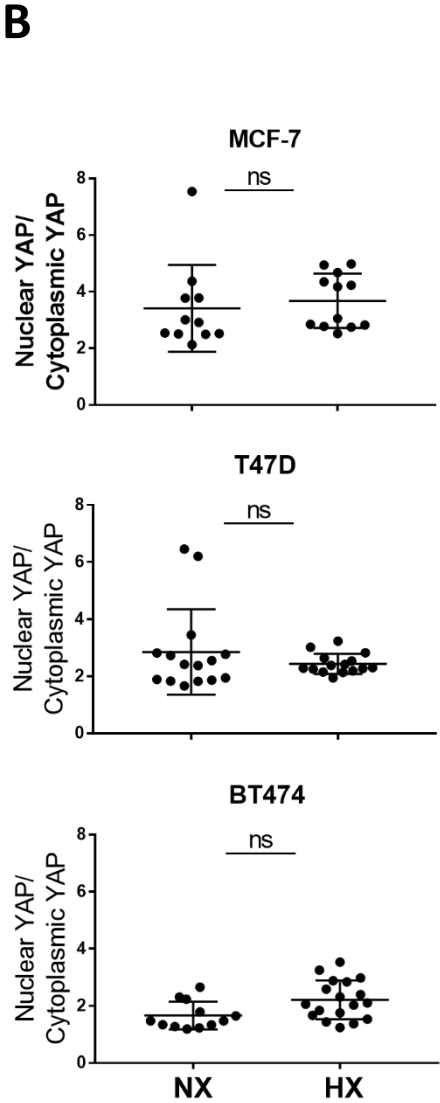

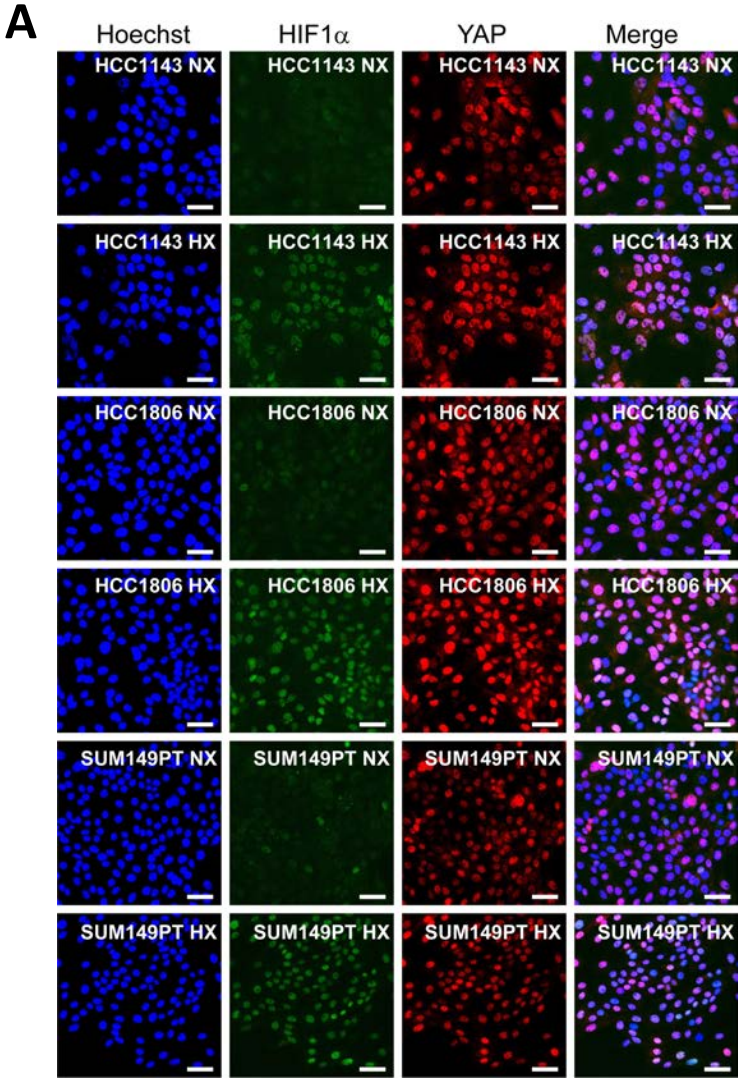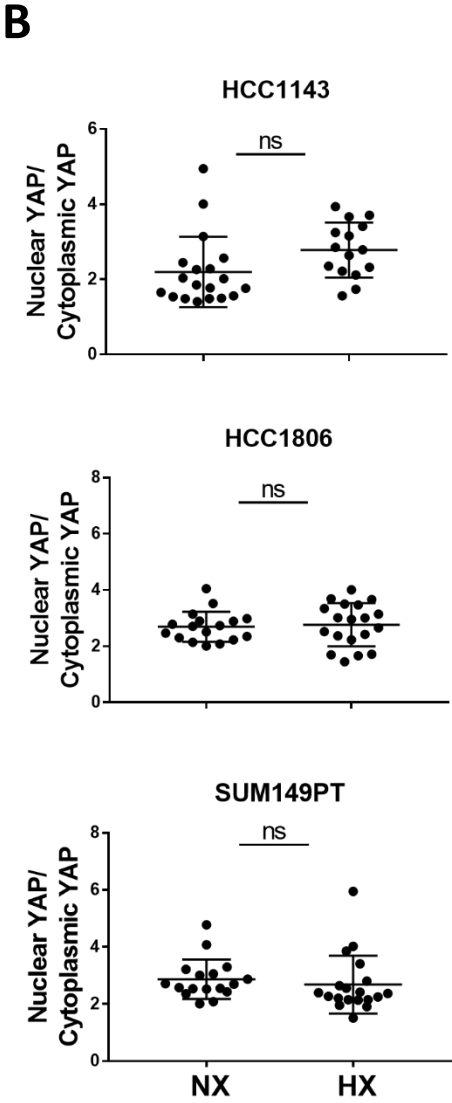

Supplement: s1 [file s1]
